# Supplementary material
Source: PubMed Central journal article supplement (PMC4402942)
Supplement: NIHMS676671-supplement-01.pdf [file NIHMS676671-supplement-01.pdf]

## **Appendix 1**

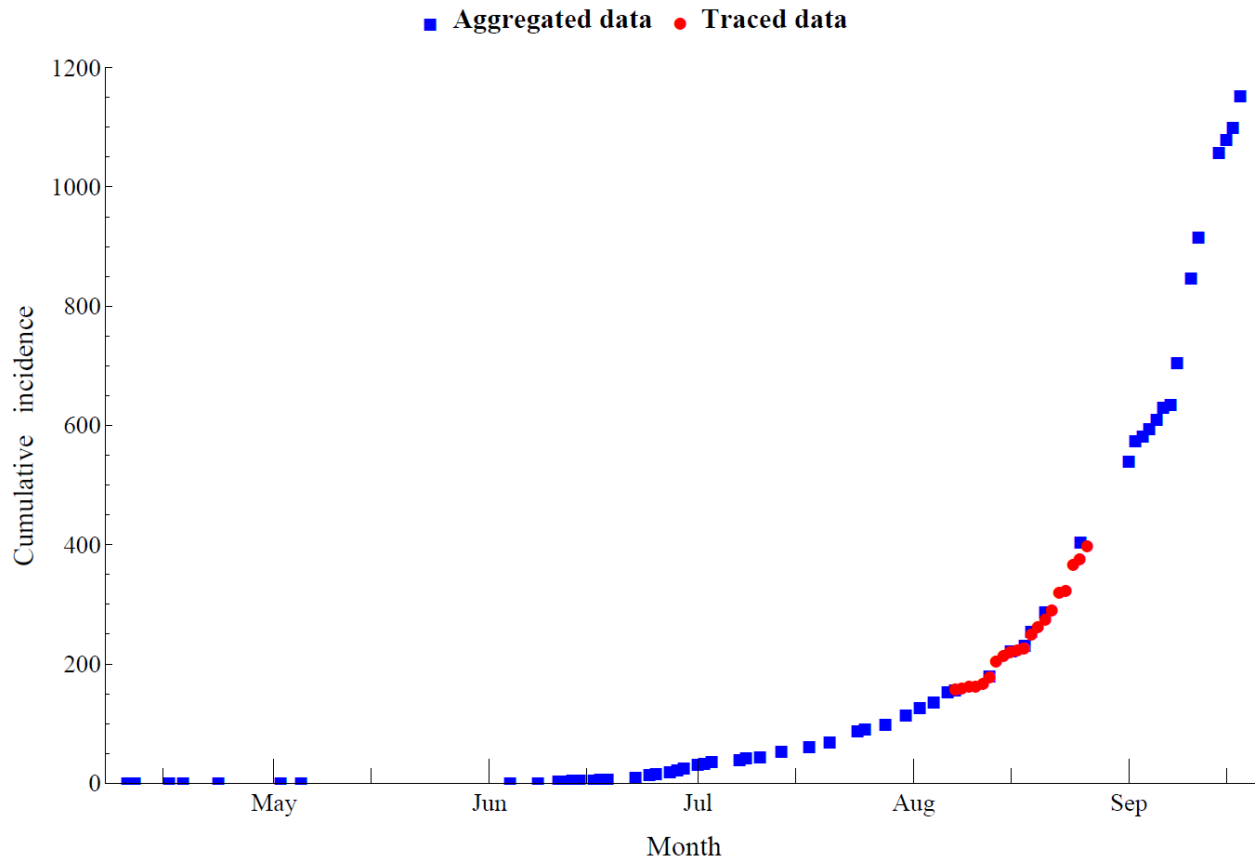

***Appendix 1 Figure 1: Cumulative incidence reported from the Liberian Ministry of Health and Social Welfare (MoHSW). Individual contact tracing data was used between August 7<sup>th</sup> and August 26<sup>th</sup>, and aggregated cases data was used in the rest of the model analysis period.***

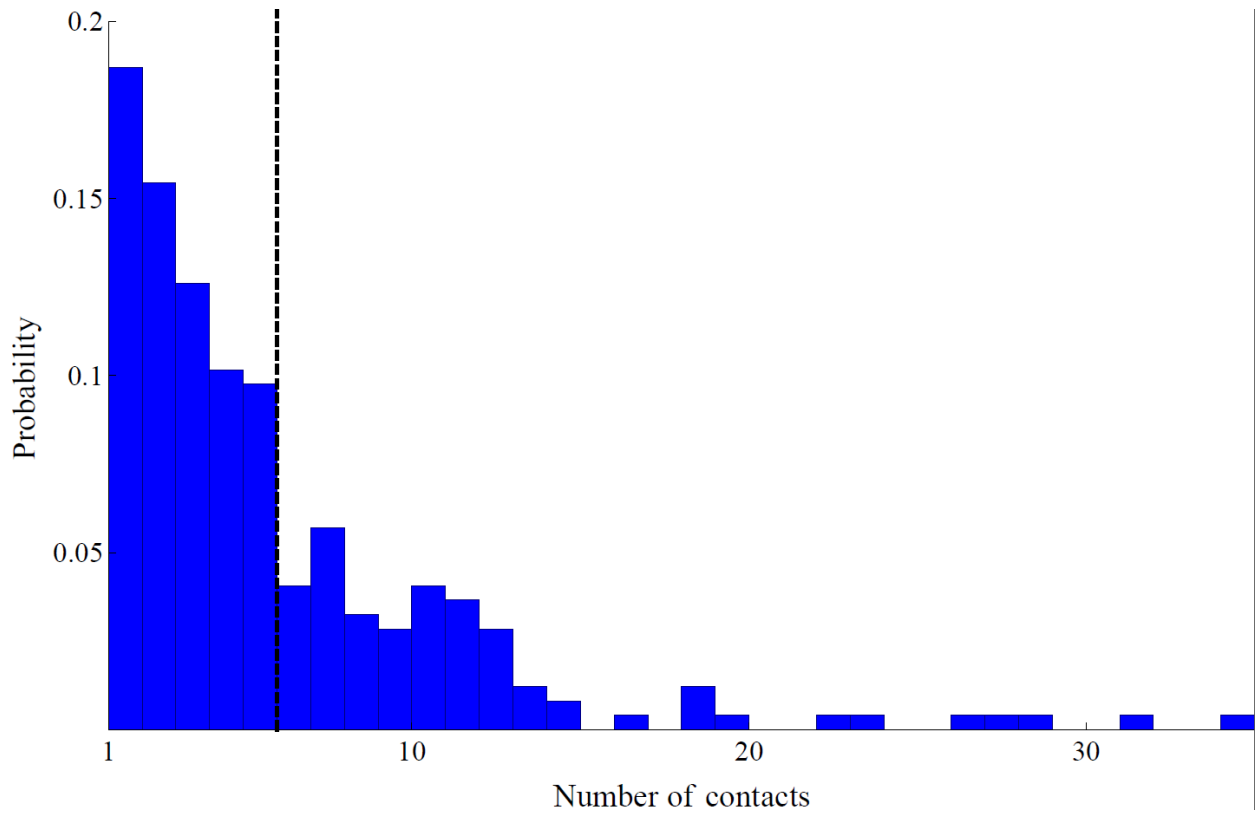

**Appendix 1 Figure 2: Contact distribution of an infected individual during the infectious period.** The dash line represents the upper bound of the number of contacts for non-survivors in the late phase.

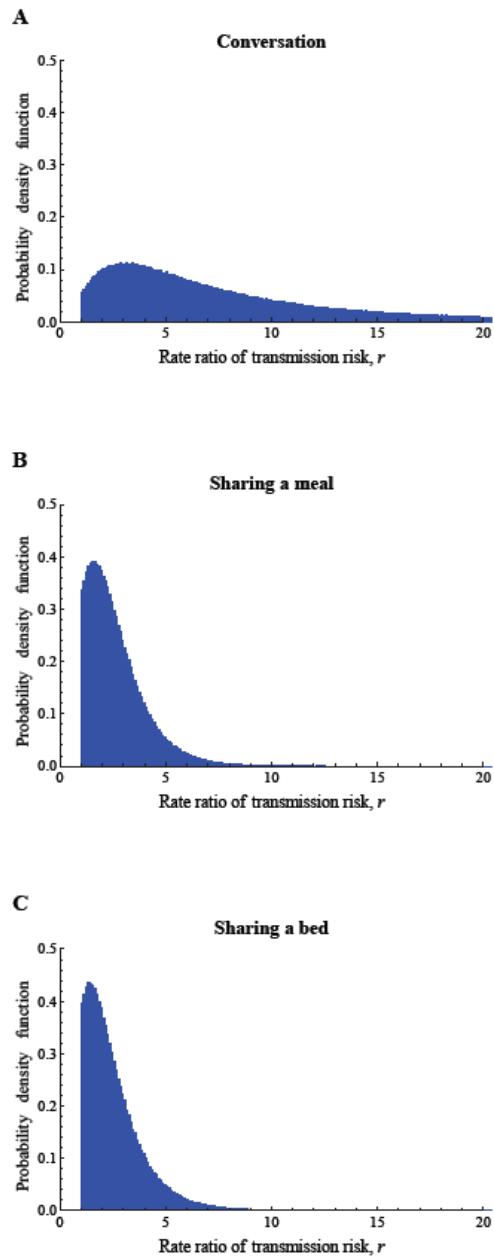

**Appendix 1 Figure 3: Distribution of the rate ratio of transmission risk for three types of contact. A. Conversation B. Sharing a meal C. Sharing a bed. Each ten-fold increase in VL is assumed to lead to an  $r$ -fold rise in infectiousness.**

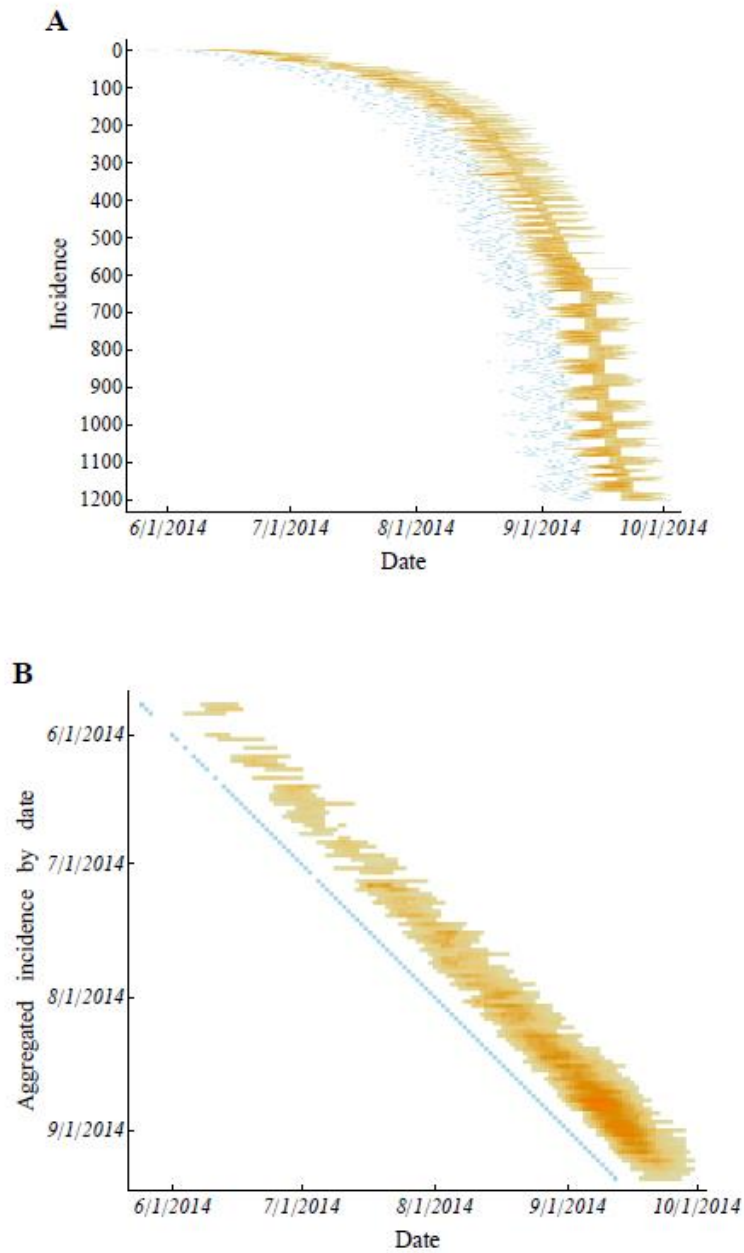

**Appendix 1 Figure 4: Visualization transmission patterns in one stochastic iteration.** Blue represents the day of exposure, yellow represents infectious period. Darker colors represent higher transmissibility resulting from a combination of contacts and viral load. A. Visualization of incidence over time B. Visualization of aggregated incidence by date.

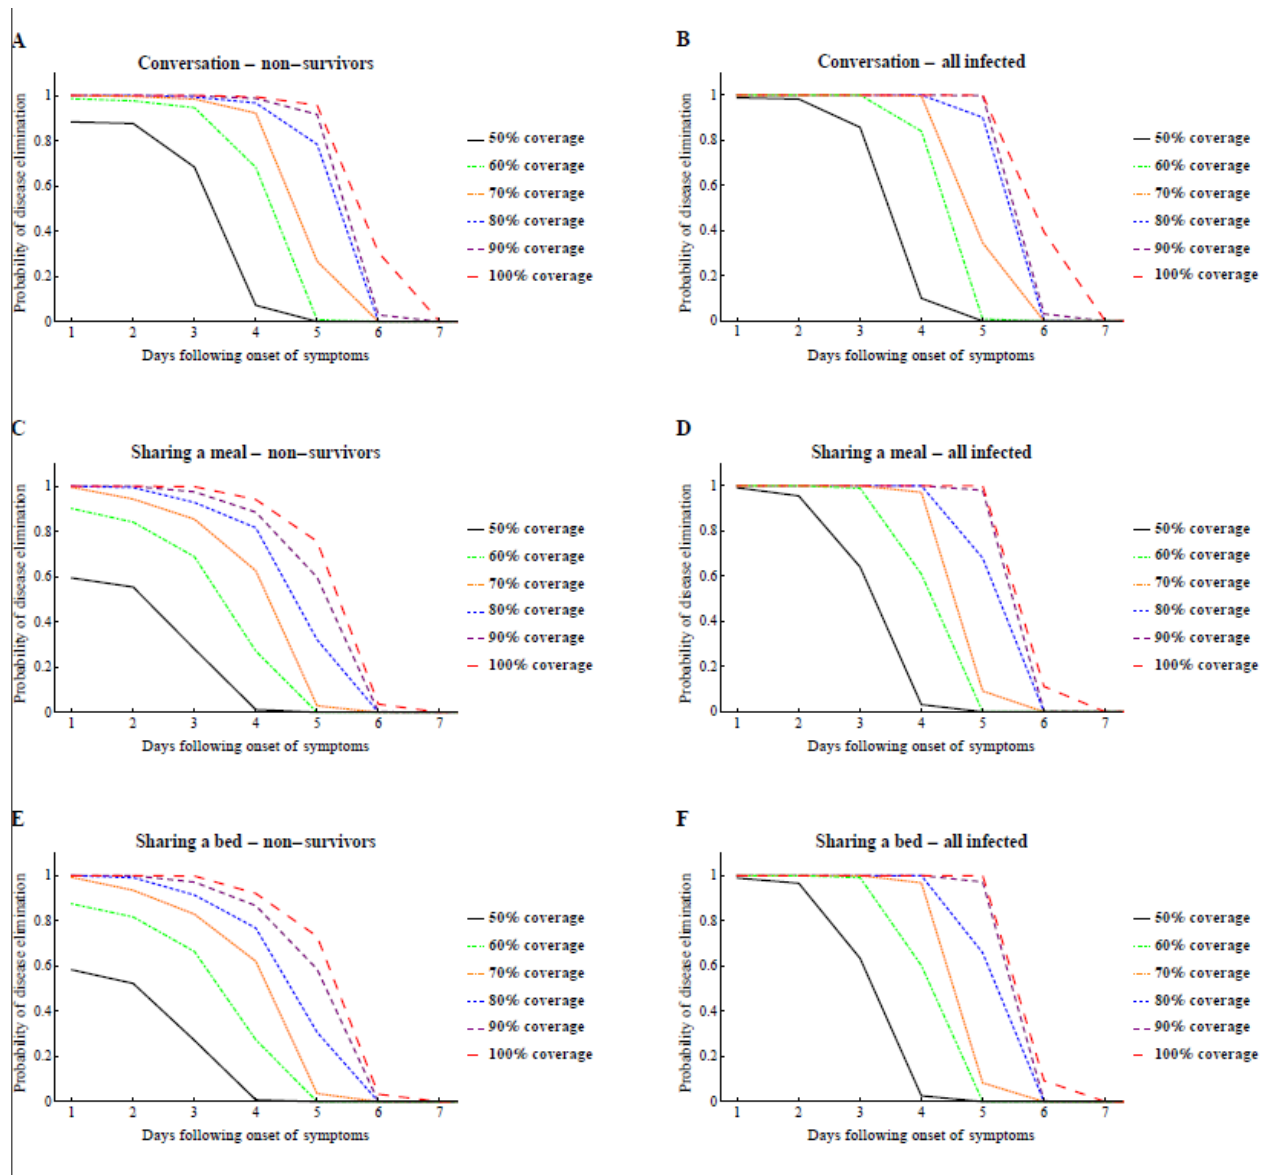

**Appendix 1 Figure 5: Probability of disease elimination from case isolation of non-survivors and of all infected for different transmission routes.** A. Conversation, non-survivors B. Conversation, all infected C. Sharing a meal, non-survivors D. Sharing a meal, all infected. E. Sharing a bed, non-survivors F. Sharing a bed, all infected.

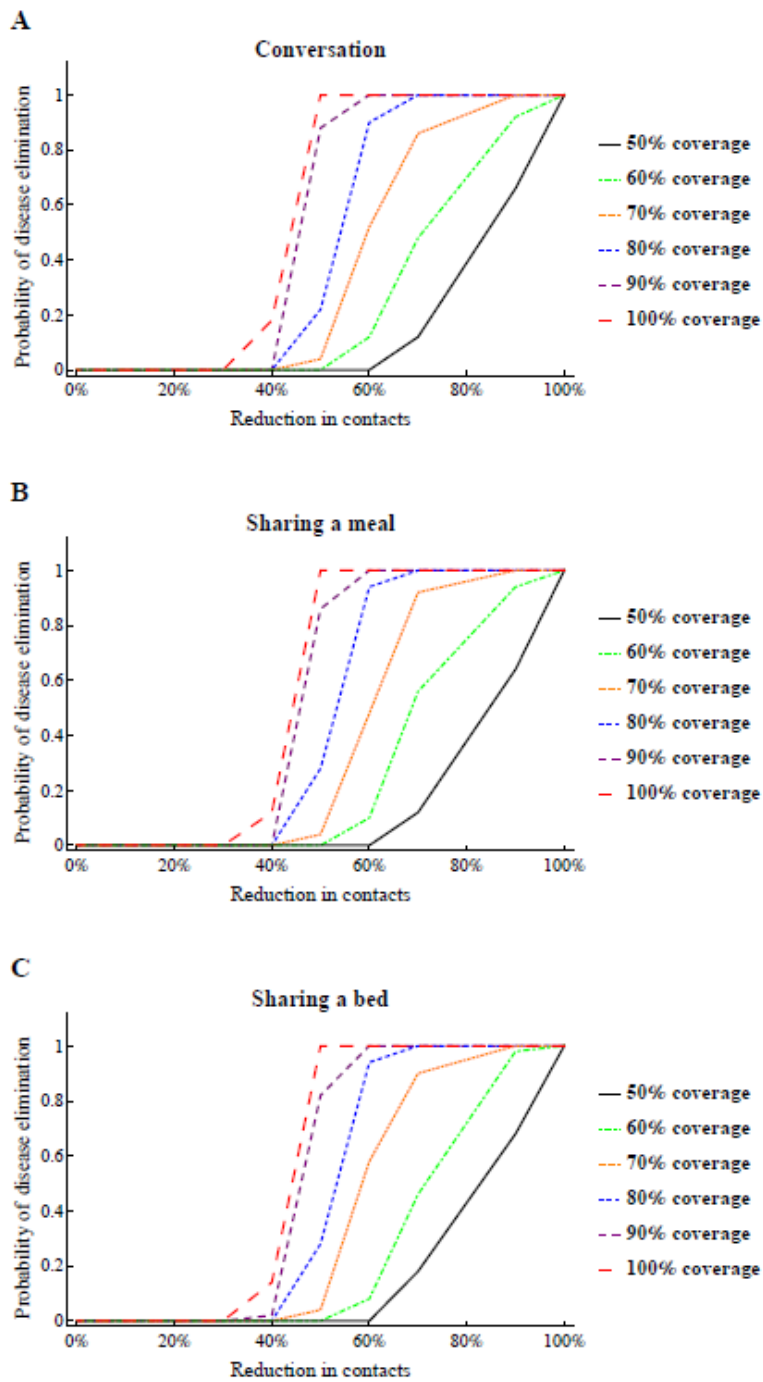

**Appendix 1 Figure 6: Probability of disease elimination from self-quarantine for different transmission routes. A. Conversation B. Sharing a meal C. Sharing a bed.**

**Appendix 2**

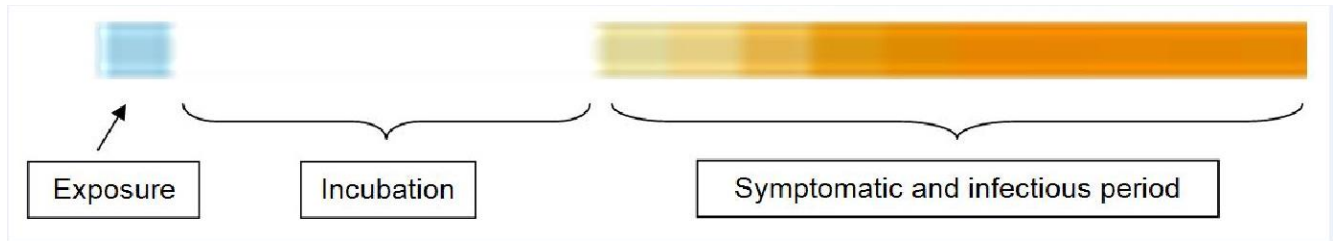

**Appendix 2 Figure 1: Disease progression for an infected individual.**

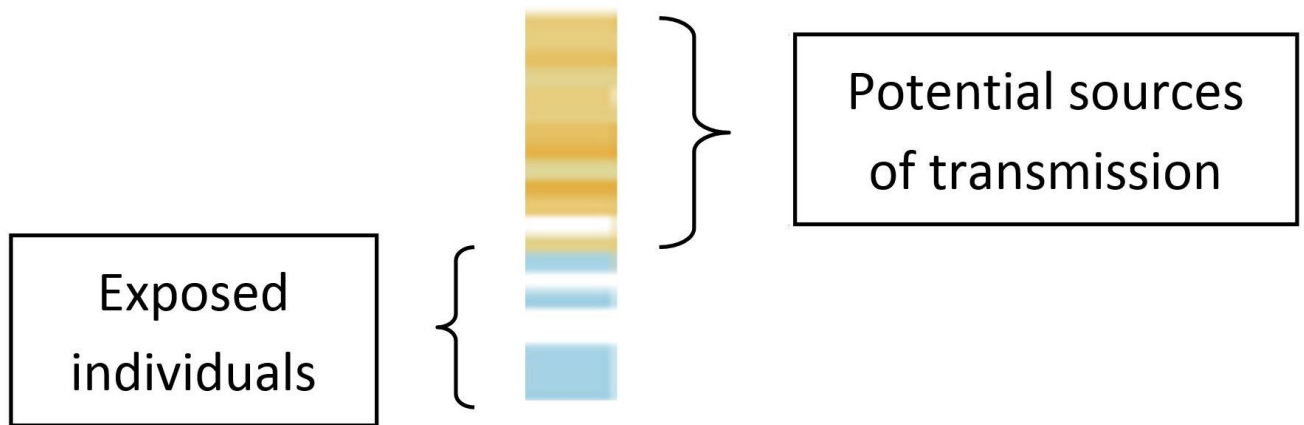

**Appendix 2 Figure 1: Assigning transmission.**

**Table 1. Parameters used in the stochastic model.**

| Parameter                                              | Symbol      | Distribution used for uncertainty analysis | Source                                   |
|--------------------------------------------------------|-------------|--------------------------------------------|------------------------------------------|
| Number of contacts during early phase                  | $C_{Early}$ | Sampled from data                          | 2014 Liberia (Appendix 1)                |
| Number of contacts during late phase for non-survivors | $C_{Late}$  | Sampled from data, between 1 and 5         | Based on household size (22)             |
| Incubation phase duration (days)                       | $\eta$      | Triangular (5,8,15) <sup>1</sup>           | (3, 9, 15, 30)                           |
| Late symptoms phase duration (days)                    | $\psi$      | Uniform (1,5)                              | (18, 21, 31, 32)                         |
| Overall symptom duration (days)                        | $\nu$       | Triangular (5,8,14) <sup>2</sup>           | (18, 21, 26)                             |
| Rate ratio of transmission risk                        | $r$         | Evaluated                                  | 1995 DCR, 2000 Uganda (8, 9, Appendix 1) |
| Daily viral load stratified by survivorship            | $V^S(t)$    | Log Normal <sup>3</sup>                    | 2000 Uganda (8)                          |

---

<sup>1</sup> Mode = 8, range (5, 15).

<sup>2</sup> Mode = 8, range (5, 14).

<sup>3</sup> Viral load was measured based on the mean and standard deviation counts of daily RNA copy levels over 14 days following symptom onset and are stratified by survivorship.
